# Supplementary material for: Wild bumble bee foraging preferences and fat content in highbush blueberry agro-ecosystems
Source: Springer Nature journal article supplement (doi:10.1007/s13592-019-00654-3), 2019-06-19
Supplement: MOESM1 [file 13592_2019_654_MOESM1_ESM.doc]

*Supplementary Material . Protein content (% crude protein) for the pollen types identified in this study, based on published estimates. If protien content was not available for species from our region, we used representative species from the same genus or family. A. Common pollen types. B. Other (minor) pollen types, comprising less than 5% of total pollen collected by bumble bees.*

| Pollen type | | Family | Representative spp. | Protein | Reference |
| --- | --- | --- | --- | --- | --- |
| *A. Common pollen types* | | |  |  |  |
| *Lonicera involucrata* | Caprifoliaceae | | *Diervilla lonicera* | 14.9 | Pernal and Currie 2001 |
| *Ranunculus* spp. | Ranunculaceae | | *Ranunculus* spp. | 16.3 | Szczesna 2006; Liolios et al. 2015 |
| *Rhododendron* spp. | Ericaceae | | *Calluna vulgaris, Vaccinium angustifolium, V. corymbosum* | 15.4 | Hanley et al. 2008  Pernal and Currie 2001;  Somerville 2005 |
| Rosaceae- Shrub | Rosaceae | | *Rubus discolor, R. ideus, R. fruticosis* | 20.3 | Hanley et al. 2008; Pernal and Currie 2001;  Somerville 2005;  Szczesna 2006 |
| Rosaceae- Tree | Rosaceae | | *Rosa canina, R. acicularis, Prunus spp.* | 21.1 | Hanley et al. 2008;  Liolios et al. 2015; Pernal and Currie 2001 |
| Sapindaceae | Sapindaceae | | Aesculus hippocastanum | 29.1 | Liolios et al. 2015 |
| *Trifolium pratense* | Fabaceae | | *Trifolium pratense* | 40.8 | Hanley et al. 2008 |
| *Trifolium repens* | Fabaceae | | *Trifolium repens* | 30.3 | Hanley et al. 2008;  Pernal and Currie 2001 |
| *Vaccinium corymbosum* | Ericaceae | | *Vaccinium corymbosum* | 13.9 | Somerville 2005 |

Supplementary material, continued

| Pollen type | | Family | Representative spp. | Protein | Reference |
| --- | --- | --- | --- | --- | --- |
| *B. Other (minor) pollen types* | | |  |  |  |
| *Acer* spp. | Aceraceae | | *Acer* spp. | 21.0 | Liolios et al. 2015 |
| Asteraceae | Asteraceae | | Asteraceae spp. *­­­Ambrosia sp., Anthemis sp., Artemesia sp.,*  *Carduus sp., Centaurea sp., Cichorium intybus, Chrysanthemum sp., Silybum marianum* | 18.7 | Baum et al. 2004; Liolios et al. 2015; Pernal and Currie 2001;  Roulston and Cane 2000 |
| Brassicaceae | Brassicaceae | | *Sisymbrium irio* | 22.3 | Liolios et al. 2015 |
| *Cerastium* spp. | Caprifoliaceae | | *Diervilla lonicera* | 14.9 | Pernal and Currie 2001 |
| Convulvus sepium | Convolvulaceae | | *Bonamia sp., Ipomoea squamosa , I. tiliacea, Merremia umbellata* | 32.3 | Roulston et al. 2000 |
| Fabaceae | Fabaceae | | *Medicago minima, Trifolium sp., Robinia pseudoacacia,*  *Vicia faba, Vicia sativa* | 29.9 | Andrada and Tellería 2005; Somerville and Nicol 2006; Liolios et al. 2015; Somerville 2005 |
| *Geranium* spp. | Geraniaceae | | Unknown |  |  |
| Liliaceae | Liliaceae | | *Allium* spp. | 23.7 | Liolios et al. 2015 |
| *Mahonia aquifolium* | Berberidaceae | | *Berberis microphylla* | 16.8 | Forcone et al. 2011 |
| *Medicago lupulina* | Fabaceae | | *Medicago minima, M. sativa, M. trunculata* | 18.7 | Andrada et al. 2005;  Somerville 2005; 2006 |
| *Phalaris arundinacea* | [Poaceae](https://en.wikipedia.org/wiki/Poaceae) | | *Phalaris arundinacea* | 10.4 | Somerville 2005 |
| *Rhamnus purshiana* | Rhamnaceae | | *Ceanothus crassifolius, C. integerrimus* | 40.4 | Roulston and Cane 2000 |
| *Salix* spp. | Salicaceae | | *Salix* spp. | 20.2 | Genissel et al. 2002; Somerville 2005 |
| Unknown conifer | Pinaceae | | *Pinus* spp. | 3.5 | Feas et al. 2012 |

References

Andrada, A.C. and Tellería, M.C., (2005) Pollen collected by honey bees (*Apis mellifera* L.) from south of Caldén district (Argentina): botanical origin and protein content. Grana **44**, 115–122.

Baum, K.A., Rubink,W.L., Coulson R.N. and Bryant, V.M., (2004) Pollen Selection by Feral Honey Bee (Hymenoptera: Apidae) Colonies in a Coastal Prairie Landscape. Environ. Entomol. **33**, 727–739.

Feas, X., Vazquez-Tato, M.P., Estevinho L., Seijas J.A. and Iglesias, A., (2012) Organic bee pollen: Botanical origin, nutritional value, bioactive compounds, antioxidant activity and microbiological quality. Molecules **17**, 8359–8377.

Forcone, A., Aloisi P.V., Ruppel S.and Munoz, M., (2011) Botanical composition and protein content of pollen collected by *Apis mellifera* L. in the north-west of Santa Cruz (Argentinean Patagonia). Grana **50**, 30–39.

Genissel, A., Aupinel P., Bressac C., Tasei J.N. and Chevrier, C., (2002) Influence of pollen origin on performance of *Bombus terrestris* micro-colonies. Entomol. Exp. Appl. **104**, 329–336.

Hanley, M.E., Franco, M., Pichon, S., Darvill, B. and Goulson, D., (2008) Breeding system, pollinator choice and variation in pollen quality in British herbaceous plants. Funct. Ecol. **22**, 592–598.

Liolios, V., Tananaki, C., Dimou, M., Kanelis, D., Goras G., Karazafiris, E. and Thrasyvoulou, A., (2015) Ranking pollen from bee plants according to their protein contribution to honey bees. J. Apic. Res. **8839**, 1–10.

Pernal, S.F. and Currie, R.W., (2001) The influence of pollen quality on foraging behavior in honeybees (*Apis mellifera* L.). Behav. Ecol. Sociobiol. **51**, 53–68.

Roulston, T.H. and Cane, J.H., (2000) Pollen nutritional content and digestibility for animals. Plant Syst. Evol. **222**, 187–209.

Roulston, T.H., Cane, J.H. and Buchmann, S.L., (2000) What Governs Protein Content of Pollen: Pollinator Preferences, Pollen-Pistil Interactions, or Phylogeny? Ecol. Monogr. **70**, 617–643.

Somerville, D., (2005) Fat bees skinny bees — a manual on honey bee nutrition for beekeepers. Aust. Gov. Rural Ind. Res. Dev. Corp. 1–142.

Somerville, D. and Nicol, H.I., (2006) Crude protein and amino acid composition of honey bee-collected pollen pellets from south-east Australia and a note on laboratory disparity. Aust. J. Exp. Agric. **46,** 141–149.

Szczesna, T., (2006) Protein content and amino acid composition of bee-collected pollen from selected botanical origins. J. Apic. Sci. **50**, 81–90.
